# Supplementary material
Source: publisher figshare collection journal article supplement (https://aacr.figshare.com/articles/dataset/_/23905289)

**Supplemental Figure 2. Chromatin state of different gain region.** The regions of gain tend to fall within active chromatin regions with G3, G4, G5, G6, and G8 lying exclusively within A-compartments (100%) across B-cell differentiation states and MM cell lines (U266, RPMI8226, and KMS11). The G1 region also followed this pattern with the exception of KMS11 (where A-compartment represented only 78% of the region). The G2 region showed variability between the normal and malignant phenotype, with moderate switching from to B-compartments of 24%, 21%, and 37% in U266, RPMI8226, and KMS11 respectively. The compartment profile of the G7 region is interesting as each sample contained considerable B-compartment percentage (range 16-82%) but within the conserved A-compartment across all samples lies the well characterised oncogene *ABL2*. The G9 region showed the greatest variability across all samples and was shifted more towards inactive chromatin (range 45-97%). NBC=Naïve B-cell, MBC=Memory B-cell, GCBC=Germinal Center B-cell, PC=plasma cell.

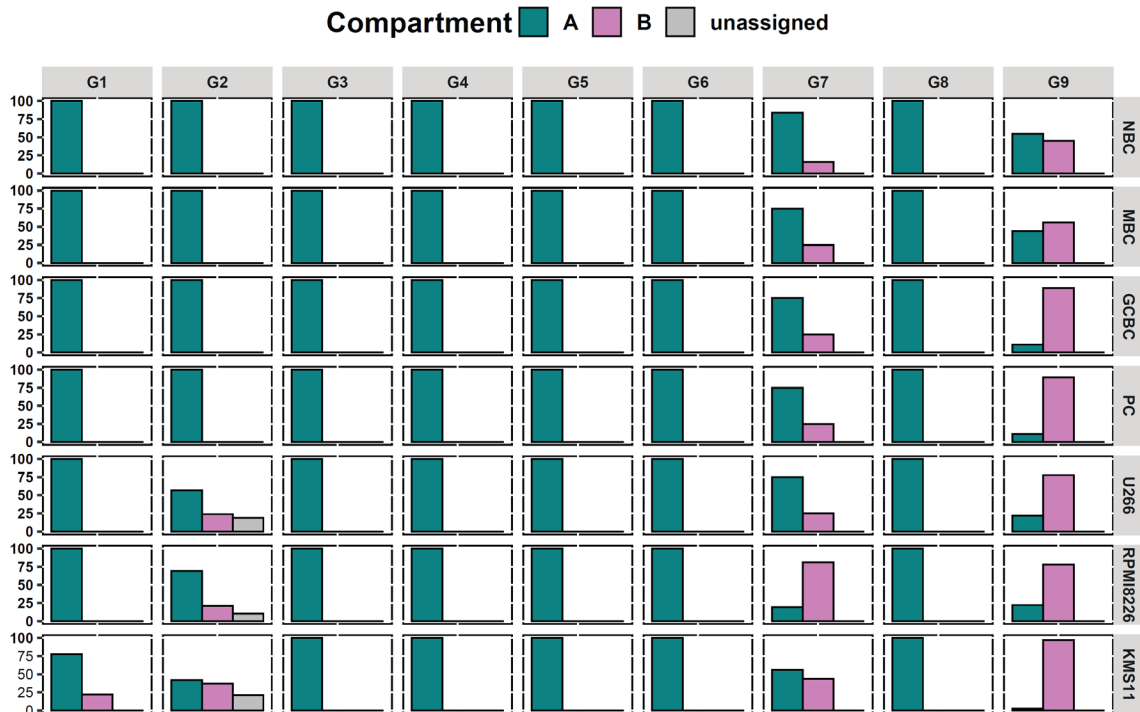

Supplement: Supplementary file 1 [file 41911472]
